# Supplementary material
Source: HighWire-hosted journal article supplement (https://www.cmajopen.ca/highwire/filestream/90828/field_highwire_adjunct_files/1/open-2023-0001-2-at.pdf)
Supplement: open-2023-0001-2-at.pdf [file open-2023-0001-2-at.pdf]

## Decision to Treat Date Reliability

OHIP encounter with surgeon +/- 1 day from listed DTT date

With any physician

| any_bill_dtt | Frequency | Percent | Frequency | Percent |
|--------------|-----------|---------|-----------|---------|
| 0            | 243582    | 17,58   | 191713    | 13,84   |
| 1            | 1142091   | 82,42   | 1193960   | 86,16   |

| proc_type              | With surgeon | With any physician |
|------------------------|--------------|--------------------|
| 01. Cataract           | 81,07        | 84,60              |
| 02. Knee arthroplasty  | 79,55        | 84,15              |
| 03. Hip arthroplasty   | 81,97        | 86,39              |
| 04. Arthroscopy (knee) | 82,87        | 85,83              |
| 06. Gallbladder        | 86,20        | 90,13              |
| 07. Inguinal hernia    | 87,15        | 90,07              |
| 09. Benign uterine     | 83,55        | 87,70              |
| Total                  | 1142091      | 1193960            |

Last pre-op encounter with surgeon corresponds to DTT date

| last_preop_dtt | Frequency | Percent |
|----------------|-----------|---------|
| 0              | 886633    | 63,99   |
| 1              | 499040    | 36,01   |

| proc_type              | last_preop_dtt |
|------------------------|----------------|
| 01. Cataract           | 24,80          |
| 02. Knee arthroplasty  | 34,81          |
| 03. Hip arthroplasty   | 45,61          |
| 04. Arthroscopy (knee) | 49,51          |
| 06. Gallbladder        | 57,56          |
| 07. Inguinal hernia    | 66,32          |
| 09. Benign uterine     | 26,64          |
| Total                  | 499040         |
